# Supplementary material for: Magnetic field assisted fabrication of asymmetric hydrogels for complex shape deformable actuators
Source: Royal Society of Chemistry journal article supplement (doi:10.1039/d1tc04790f), 2021-11-30
Supplement: d1tc04790f1.pdf [file d1tc04790f1.pdf]

## Supporting information

### **Magnetic Field Assisted Fabrication of Asymmetric Hydrogels for Complex Shape Deformable Actuators**

Chen Gong<sup>a,1</sup>, Yanduo Zhai<sup>a,1</sup>, Jinping Zhou<sup>a</sup>, Yixiang Wang<sup>b,\*</sup>, Chunyu Chang<sup>a,\*</sup>

<sup>a</sup> College of Chemistry and Molecular Sciences, Engineering Research Center of Natural Polymer-based Medical Materials in Hubei Province, and Laboratory of Biomedical Polymers of Ministry of Education, Wuhan University, Wuhan, 430072, China

<sup>b</sup>Department of Food Science and Agricultural Chemistry, McGill University, Ste Anne de Bellevue, Quebec H9X 3 V9, Canada

<sup>1</sup>These authors contribute equally to this work.

\*Corresponding author

Prof. Chunyu Chang; Prof. Yixiang Wang

Email: changcy@whu.edu.cn (C. Chang)

yixiang.wang@mcgill.ca (Y. Wang)

ORCID: 0000-0002-3531-5964 (C. Chang)

0000-0001-8386-7491 (Y. Wang)

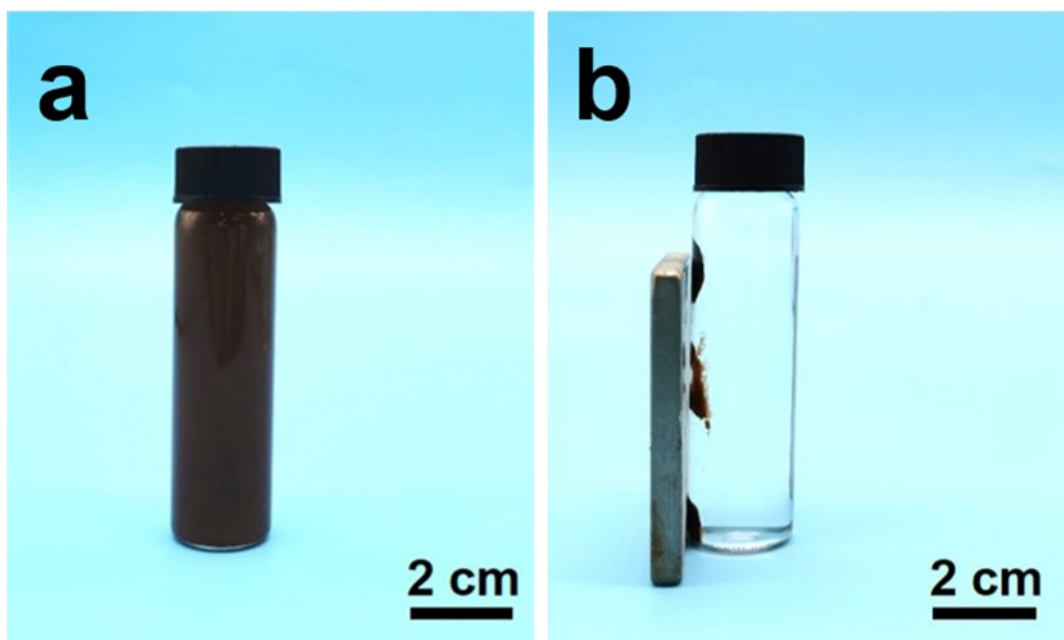

**Figure S1.** Photographs of  $\text{Fe}_3\text{O}_4@\text{TCNC}$  suspension after standing for 24 h (a) and attracting with magnets for 2 min (b).

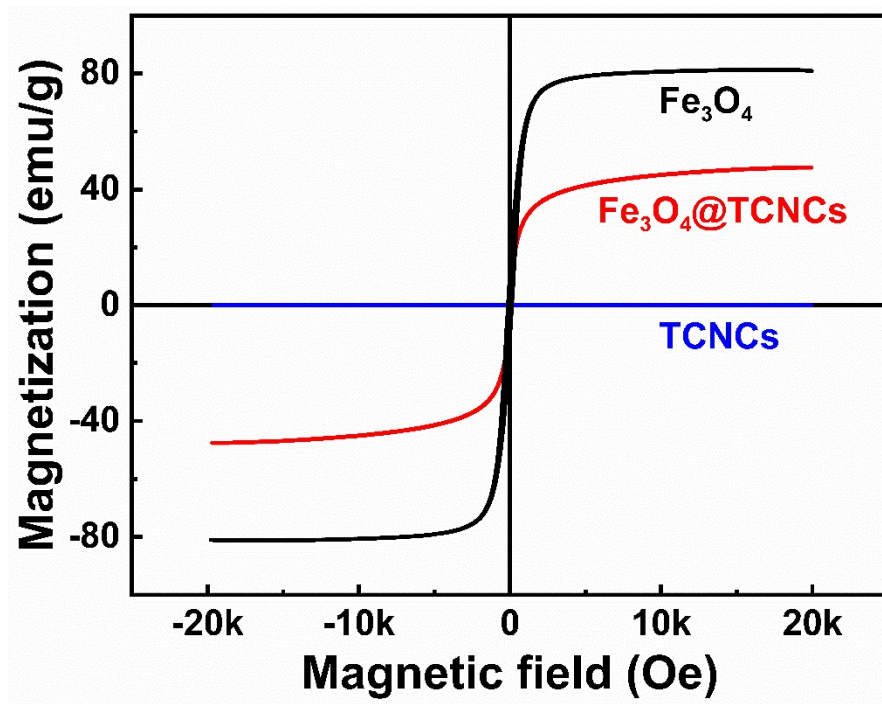

**Figure S2.** Magnetic hysteresis loops of Fe<sub>3</sub>O<sub>4</sub> nanoparticles, Fe<sub>3</sub>O<sub>4</sub>@TCNCs, and TCNCs.

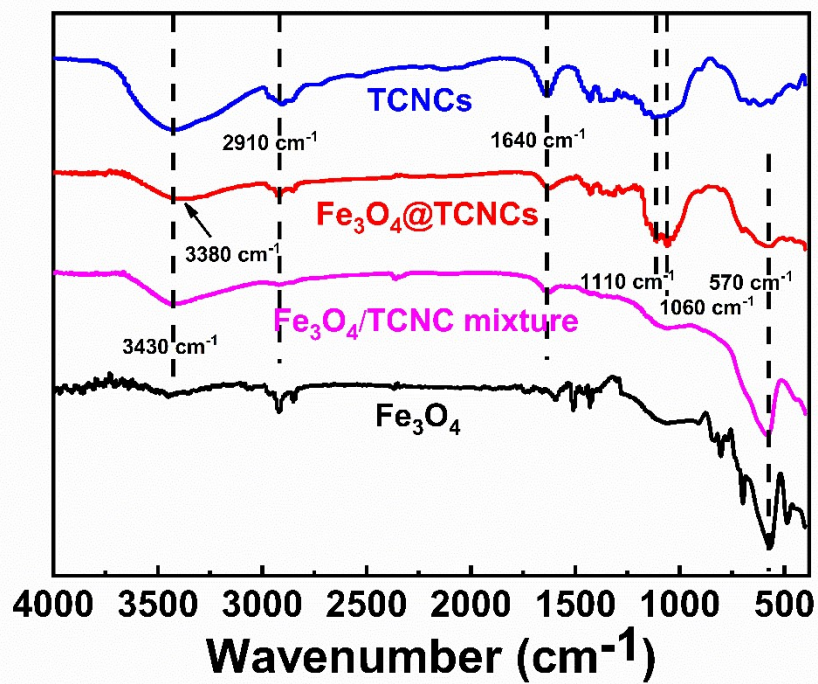

**Figure S3.** FTIR spectra of TCNCs, Fe<sub>3</sub>O<sub>4</sub>@TCNCs, Fe<sub>3</sub>O<sub>4</sub>/TCNC mixture, and Fe<sub>3</sub>O<sub>4</sub> powder.

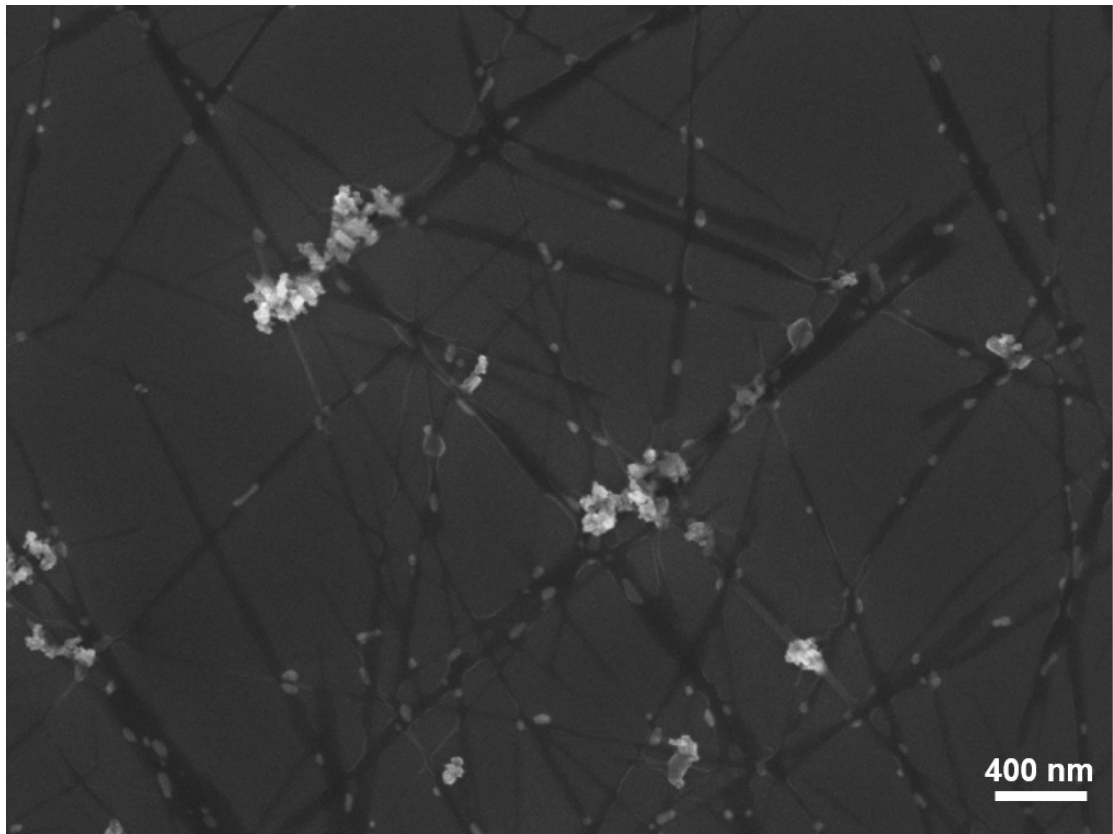

**Figure S4.** The SEM image of Fe<sub>3</sub>O<sub>4</sub>@TCNCs composite particles.

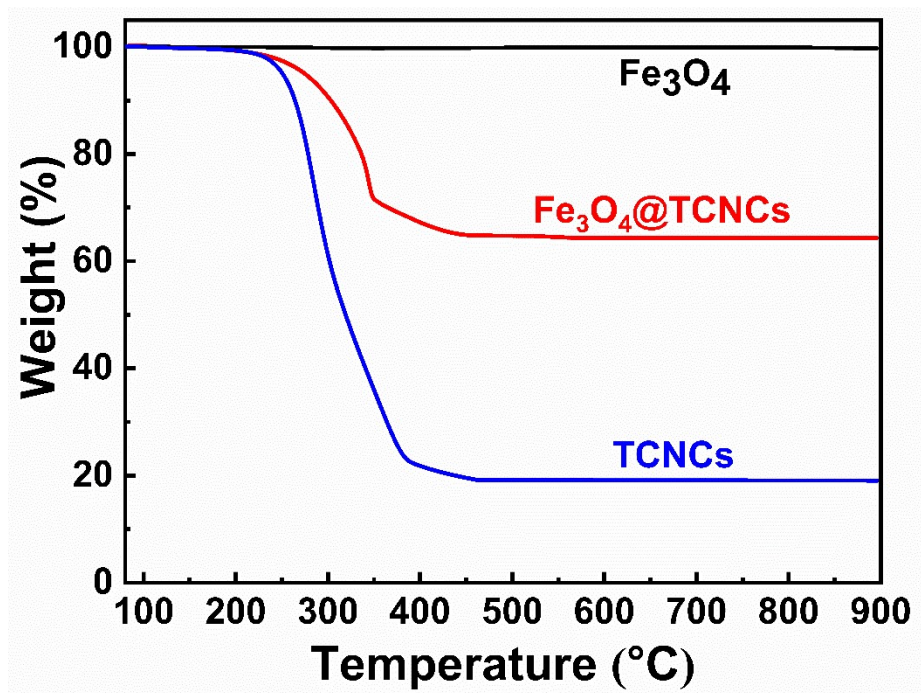

**Figure S5.** Thermal gravimetric curves of Fe<sub>3</sub>O<sub>4</sub>, Fe<sub>3</sub>O<sub>4</sub>@TCNCs, TCNCs under the N<sub>2</sub> atmosphere.

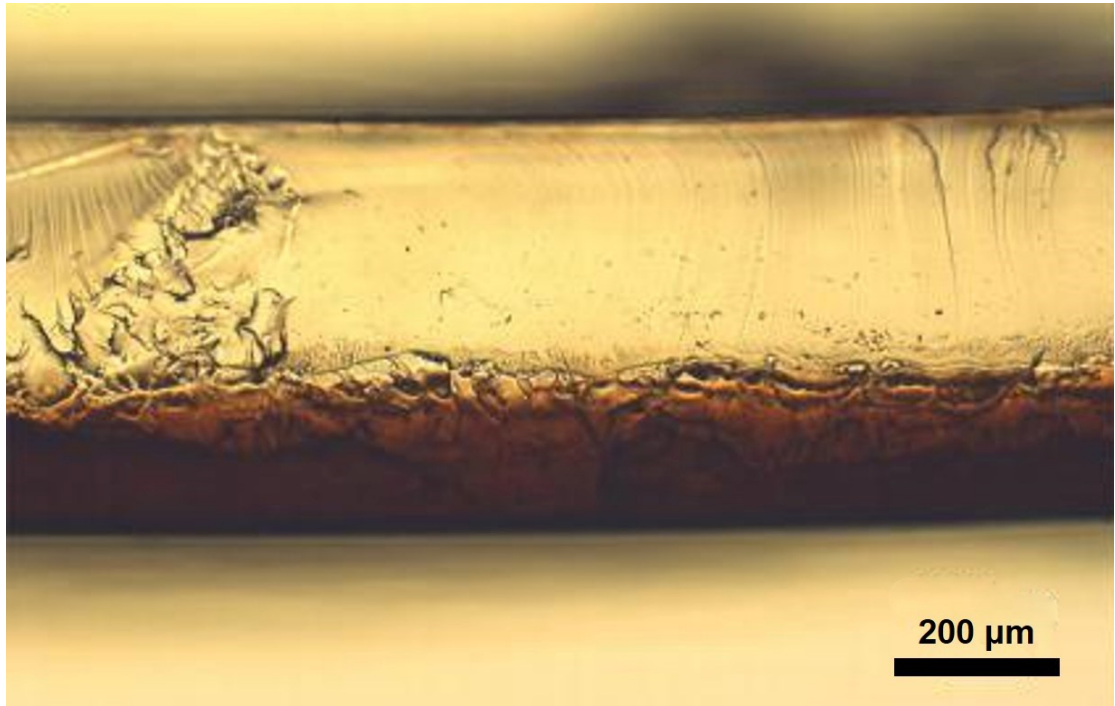

**Figure S6.** Optical image of the cross-section of asymmetric hydrogel.



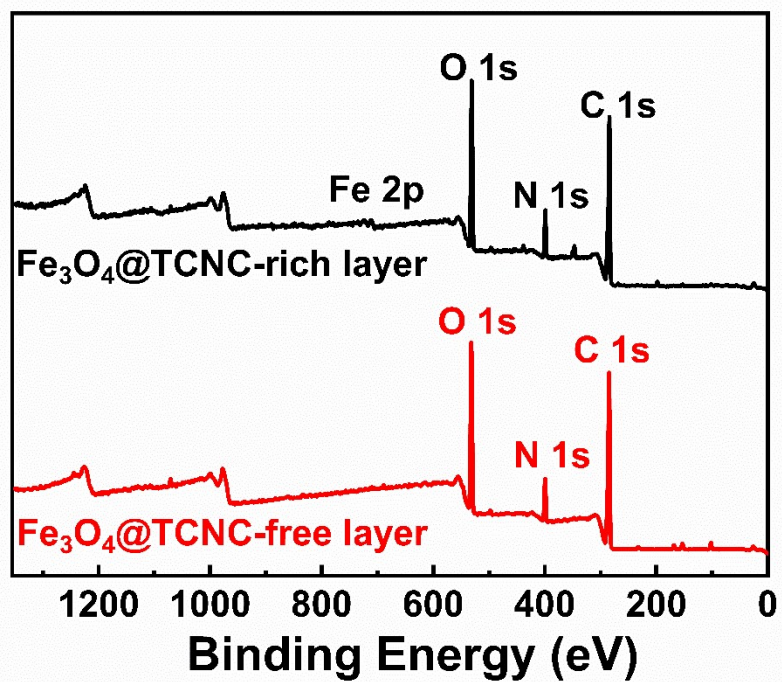

**Figure S7.** XPS spectra of Fe<sub>3</sub>O<sub>4</sub>@TCNC-rich layer and Fe<sub>3</sub>O<sub>4</sub>@TCNC-free layer of the asymmetric hydrogel.



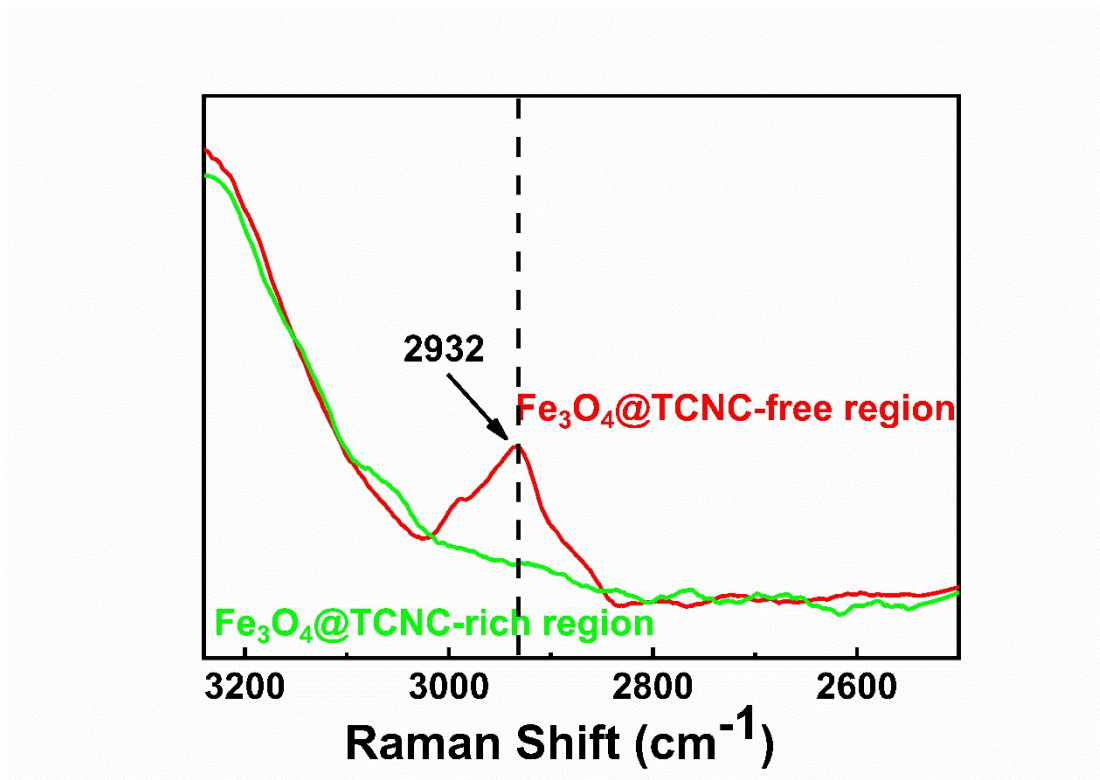

**Figure S8.** Raman spectra of Fe<sub>3</sub>O<sub>4</sub>@TCNC-rich region and Fe<sub>3</sub>O<sub>4</sub>@TCNC-free region of the asymmetric hydrogel.

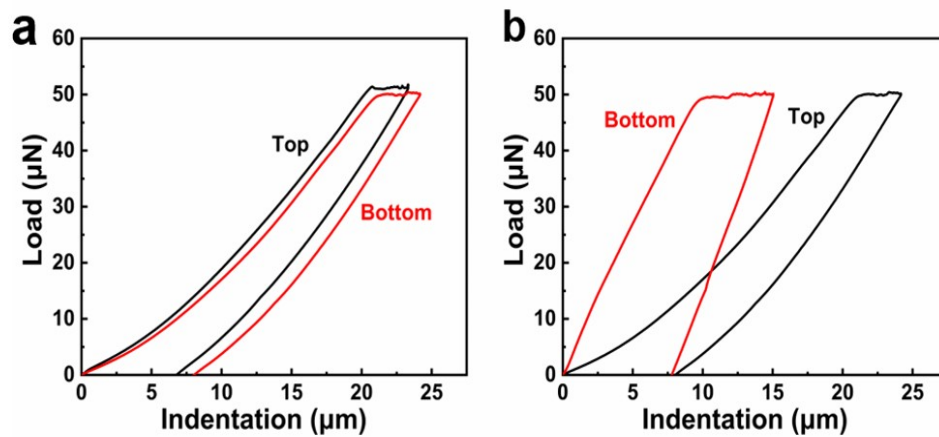

**Figure S9.** Nanoindentation curves for the top and bottom surfaces of isotropic hydrogel (a) and asymmetric hydrogel (b).

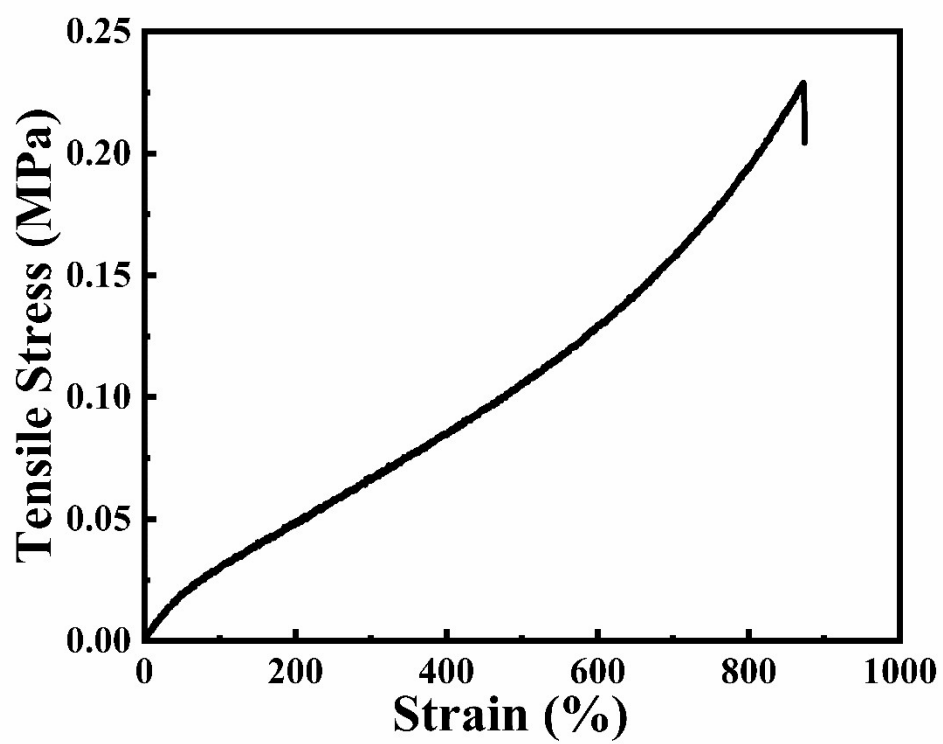

**Figure S10.** Tensile stress-strain curve of the hydrogel actuator.

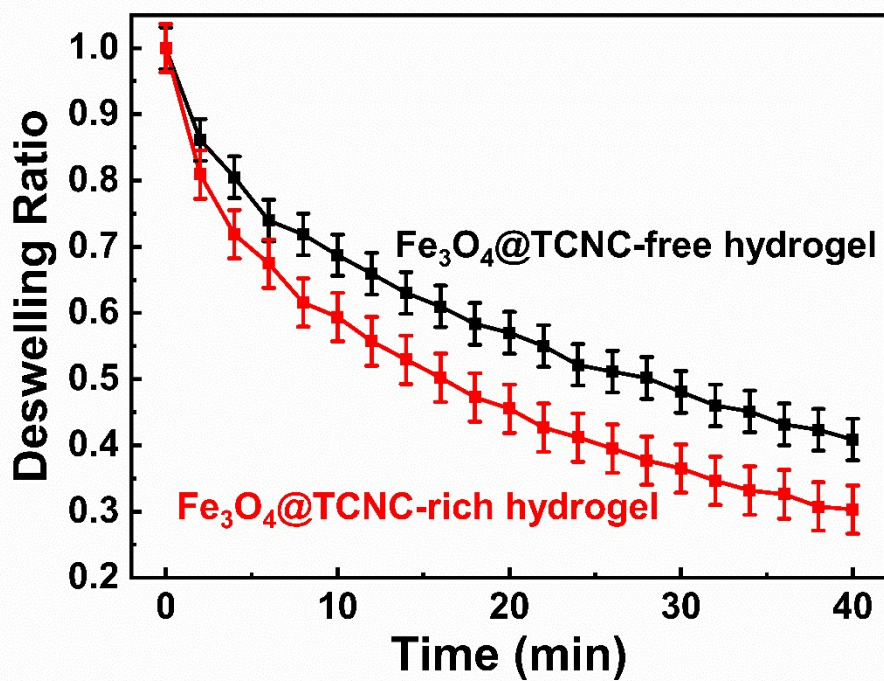

**Figure S11.** Deswelling kinetic curves of Fe<sub>3</sub>O<sub>4</sub>@TCNC-rich and Fe<sub>3</sub>O<sub>4</sub>@TCNC-free hydrogels.

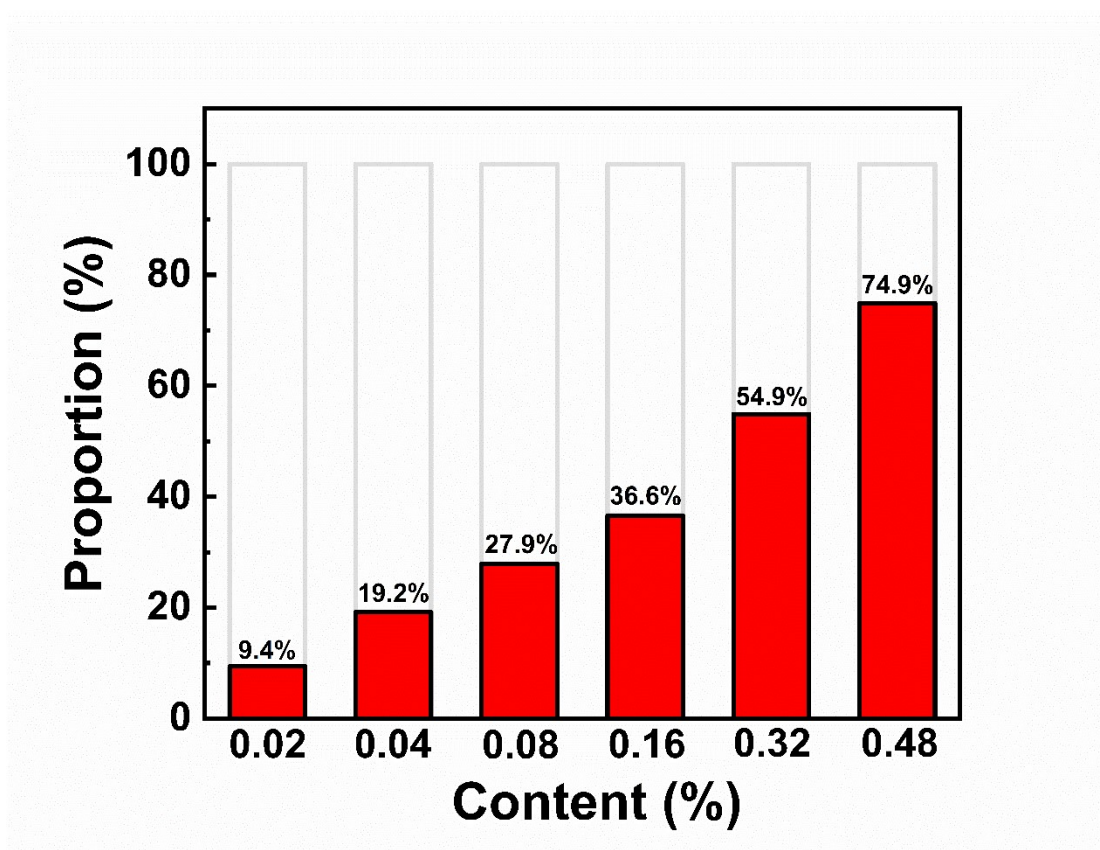

**Figure S12.** The thickness proportion of Fe<sub>3</sub>O<sub>4</sub>@TCNC-rich layer on the cross-section of hydrogels.

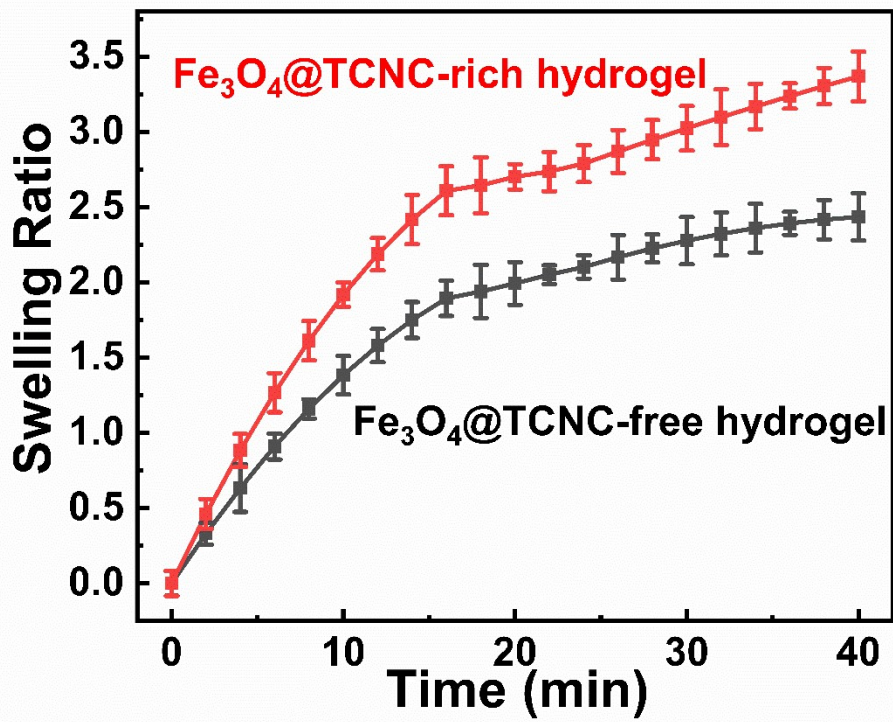

**Figure S13.** Swelling kinetic curves of  $\text{Fe}_3\text{O}_4@TCNC$ -rich and  $\text{Fe}_3\text{O}_4@TCNC$ -free hydrogels.



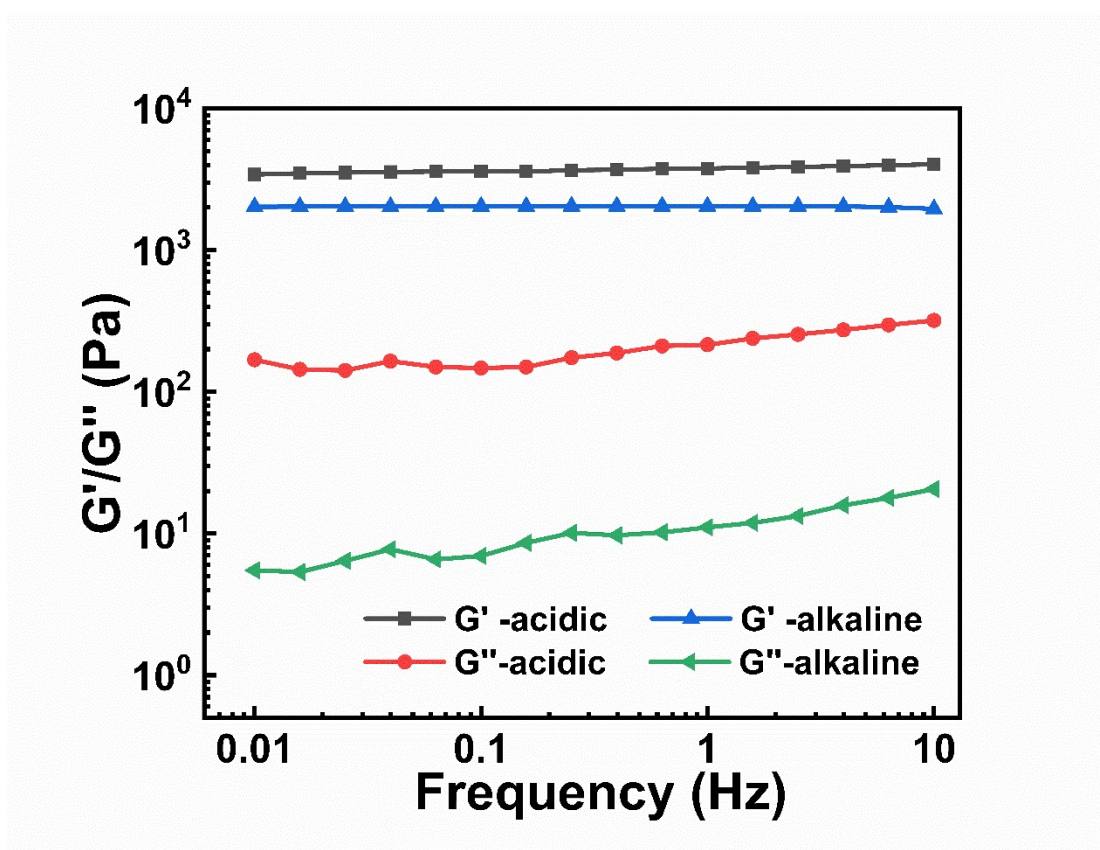

**Figure S14.** Elastic modulus ( $G'$ ) and loss modulus ( $G''$ ) of hydrogel as a function of frequency.
